# Supplementary material for: Neutralization of Acidic Intracellular Vesicles by Niclosamide Inhibits Multiple Steps of the Dengue Virus Life Cycle In Vitro
Source: PubMed Central journal article supplement (PMC6582152; doi:10.1038/s41598-019-45095-1), 2019-06-18
Supplement: 41598_2019_45095_MOESM1_ESM.pdf [file 41598_2019_45095_MOESM1_ESM.pdf]

## Supplementary Information

### Neutralization of Acidic Intracellular Vesicles by Niclosamide Inhibits Multiple Steps of the Dengue Virus Life Cycle *In Vitro*

Eunhye Jung<sup>1§</sup>, Sangwoo Nam<sup>1,6§</sup>, Hyeryeon Oh<sup>1</sup>, Sangmi Jun<sup>2,3,7</sup>, Hyun-Joo Ro<sup>2,3,7</sup>, Baek  
Kim<sup>4,5</sup>, Meehyein Kim<sup>1,6</sup>, Yun Young Go<sup>1,6\*</sup>

<sup>1</sup>Virus Research Group, Korea Research Institute of Chemical Technology, Daejeon, Republic of Korea

<sup>2</sup>Convergent Research Center for Emerging Virus Infection, Korea Research Institute of Chemical Technology, Daejeon, Republic of Korea

<sup>3</sup>Drug and Disease Target Group, Korea Basic Science Institute, Cheongju, Republic of Korea

<sup>4</sup>Center for Drug Discovery, Department of Pediatrics, School of Medicine, Emory University, Atlanta, GA, 30322, USA

<sup>5</sup>Department of Pharmacy, College of Pharmacy, Kyung Hee University, Seoul, Republic of Korea

<sup>6</sup>Department of Medicinal Chemistry and Pharmacology, University of Science and Technology, Daejeon, Republic of Korea

<sup>7</sup>Bio-Analytical Science, University of Science and Technology, Daejeon, Republic of Korea

\*Corresponding author: Yun Young Go; e-mail: [yygo@kriict.re.kr](mailto:yygo@kriict.re.kr)

§Equal contribution

Supplementary Figure 1

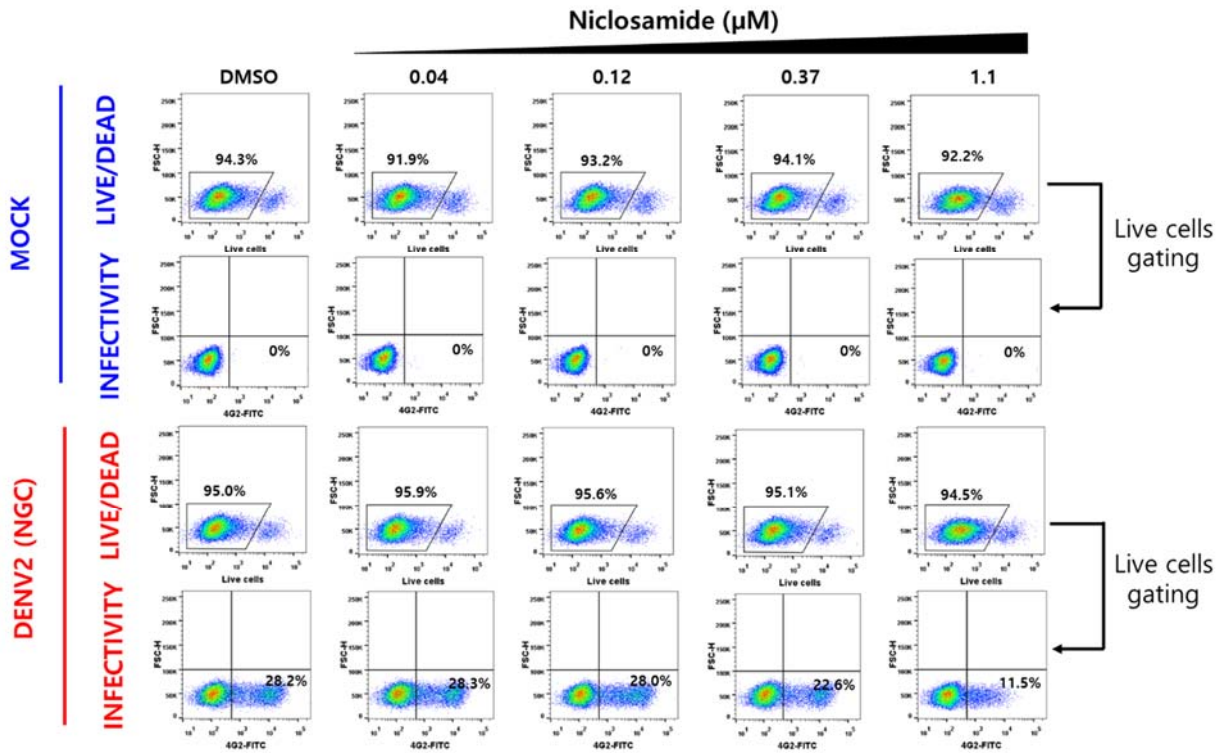

**Figure S1.** Evaluation of percentage of live/dead cells for mock- and DENV-2 (NGC)-infected Huh-7 cells with increasing concentrations of niclosamide by flow cytometry analysis. Live cells are gated and the percentages are indicated. The DENV-positive cell population is shown in the lower right quadrant.

Supplementary Figure 2

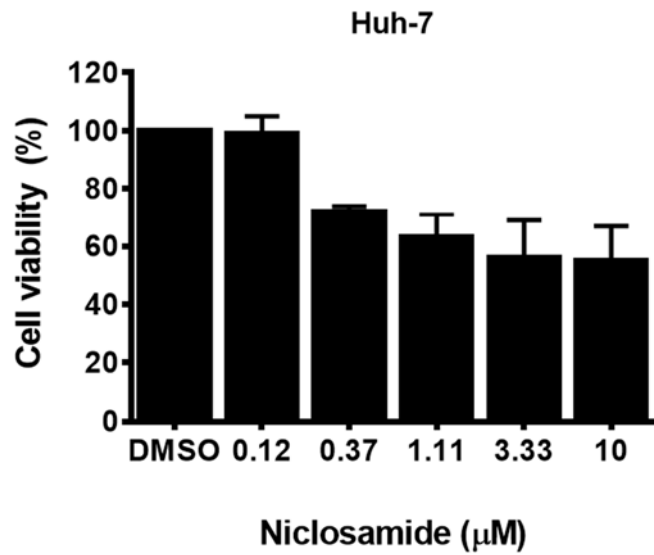

**Figure S2.** Huh-7 cells were treated with serial-dilutions of niclosamide for 24 h. Cell viability was measured using CellTiter 96 Non-radioactive Cell Proliferation Assay. The data represent means ( $\pm$  SD) of at least two independent experiments performed in duplicate.

### Supplementary Figure 3

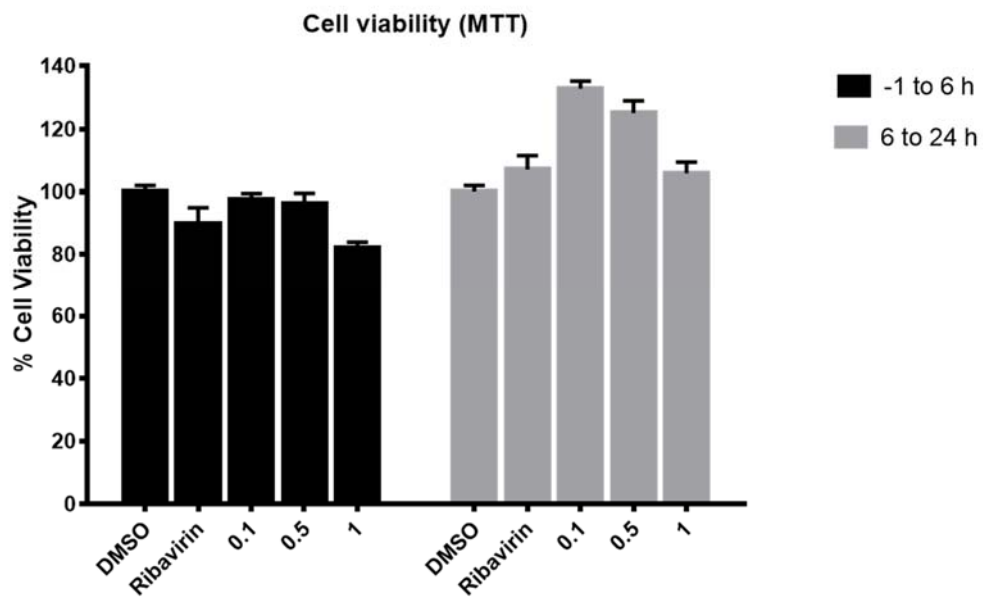

**Figure S3.** BHK-D2-Fluc replicon cells were treated with different concentrations of niclosamide at indicated times. DMSO was used as solvent control. Cell viability was measured using CellTiter 96 Non-radioactive Cell Proliferation Assay. The data represent means ( $\pm$  SD) of at least two independent experiments performed in duplicate.

Supplementary Figure 4

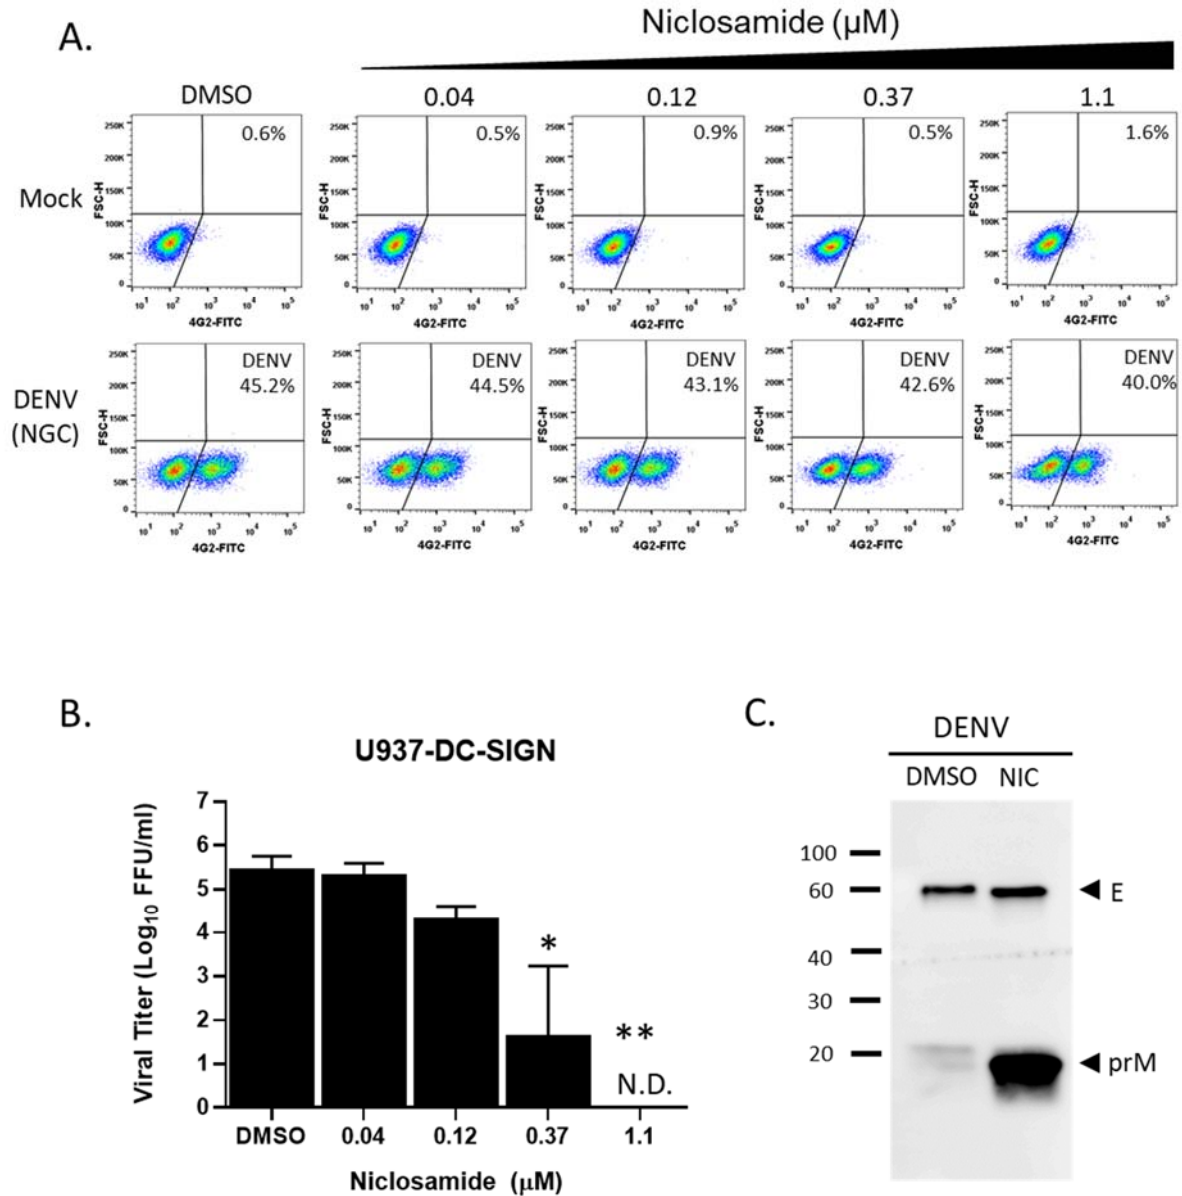

**Figure S4.** Niclosamide-induced endosomal pH neutralization impairs the maturation of DENV in U937-DC-SIGN cells. (A) Representative dot plot analysis (FSC x 4G2-AF488) of U937-DC-SIGN cells (human lymphocytes expressing dendritic cell-specific intercellular adhesion molecule 3-grabbing non-integrin, ATCC<sup>®</sup> CRL-3253<sup>™</sup>) mock-infected (upper panels) or infected with DENV-2 (NGC strain, lower panels) in the presence of the indicated concentrations of niclosamide. The DENV-positive cell population is shown in the lower right quadrant. (B) Virus titres from cell culture supernatants were determined with a plaque assay. The data represent the means ( $\pm$  SD) of at least two independent experiments performed in duplicate. N.D., not detected. (C) Western blot analysis of prM and E proteins of DENV purified from culture supernatants treated with niclosamide or DMSO. Uncropped image is provided in the supplemental material. \*  $p < 0.05$  and \*\*  $p < 0.01$  compared to DMSO control.

Uncropped Western blot images

Figure 2E

DENV NS3

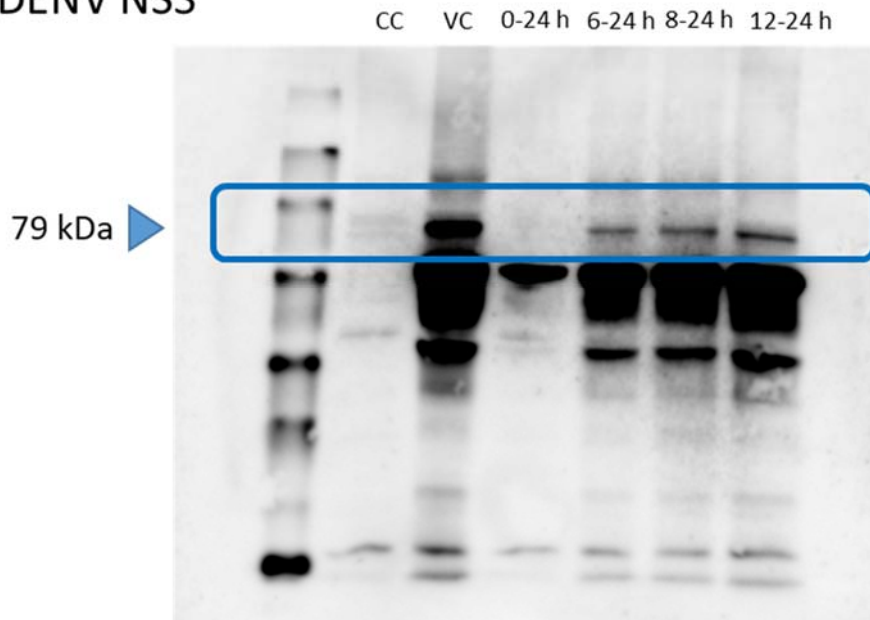

DENV E

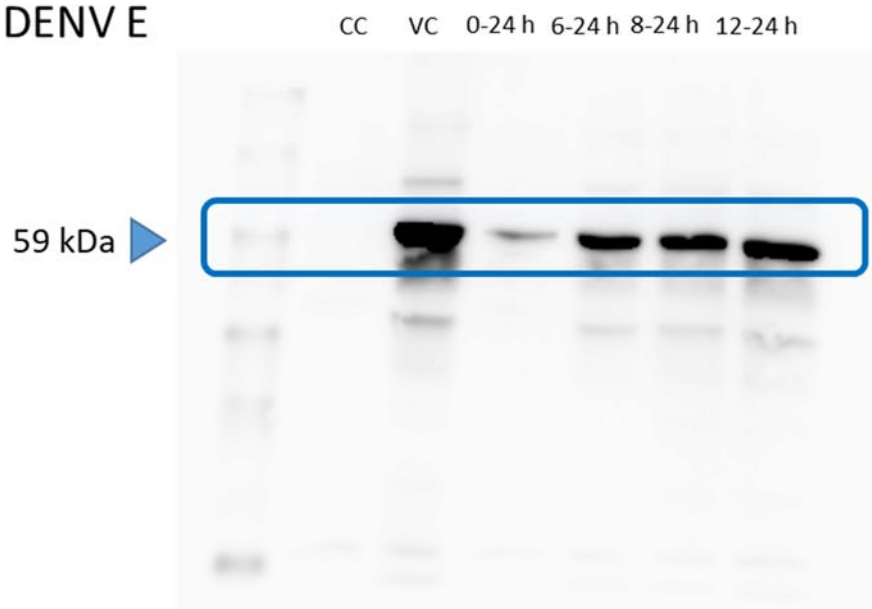

B-actin

CC VC 0-24 h 6-24 h 8-24 h 12-24 h

42 kDa ▶

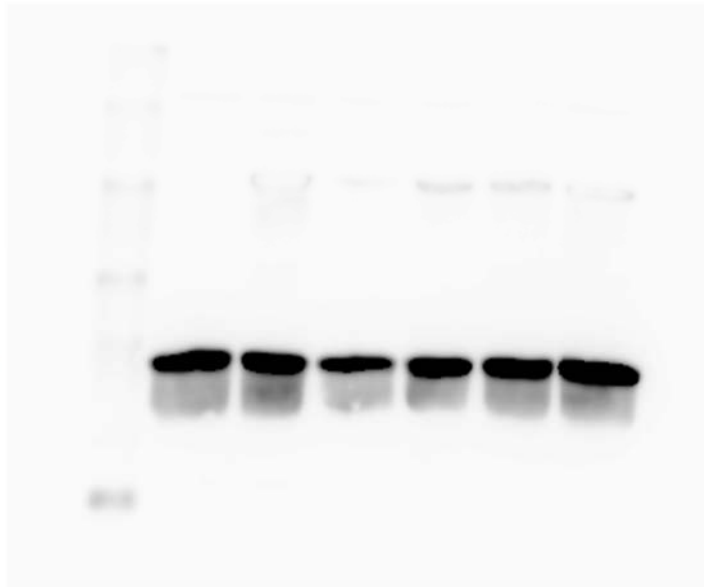

Figure 3F

DENV NS3

79 kDa

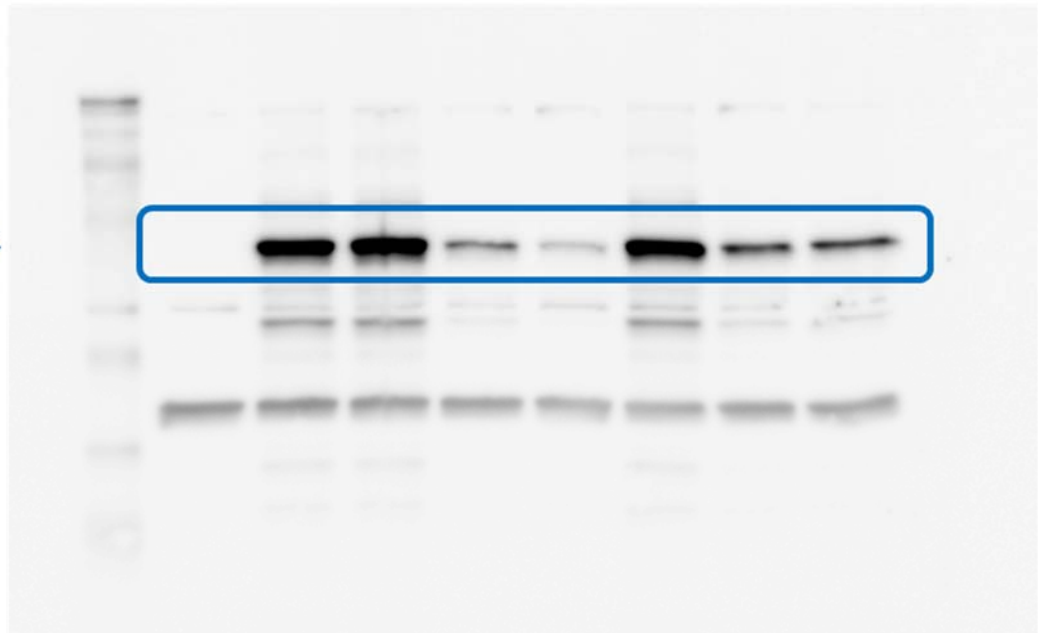

$\beta$ -actin

42 kDa

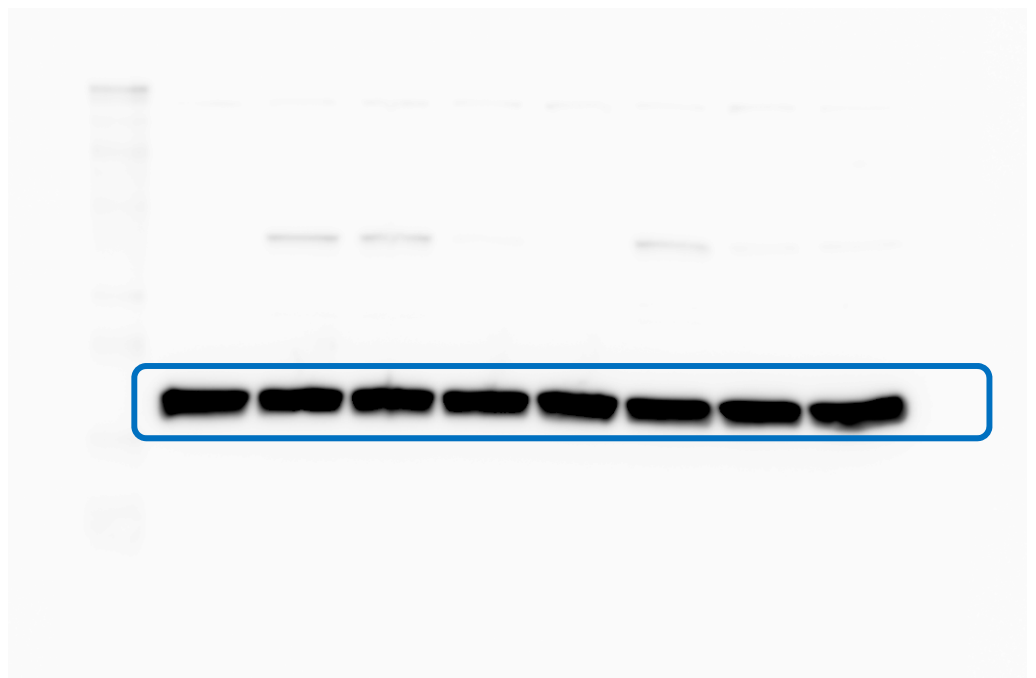



Figure 4A

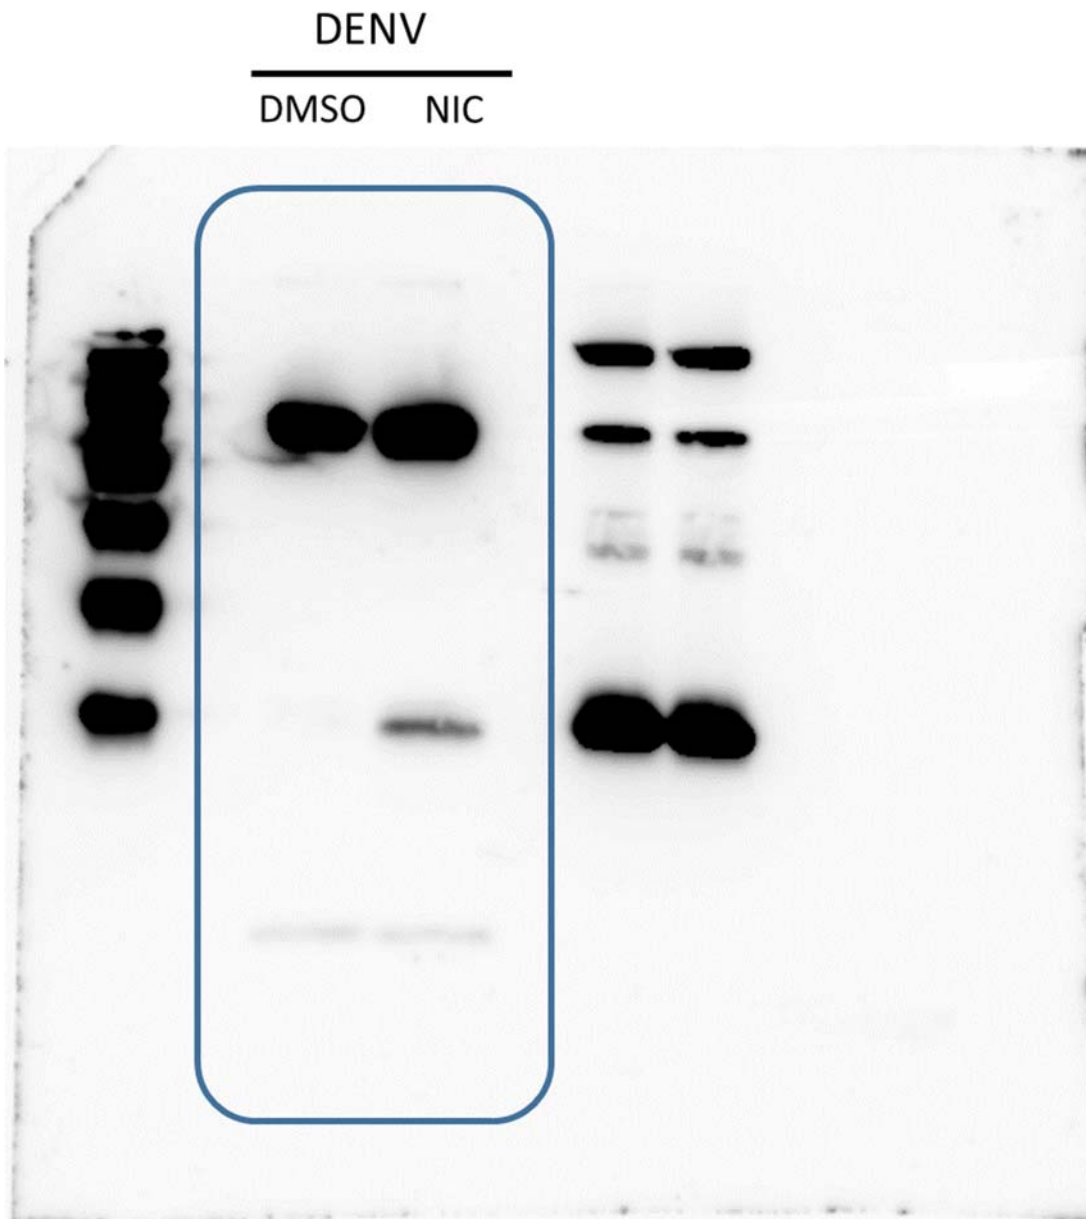

Figure 5C

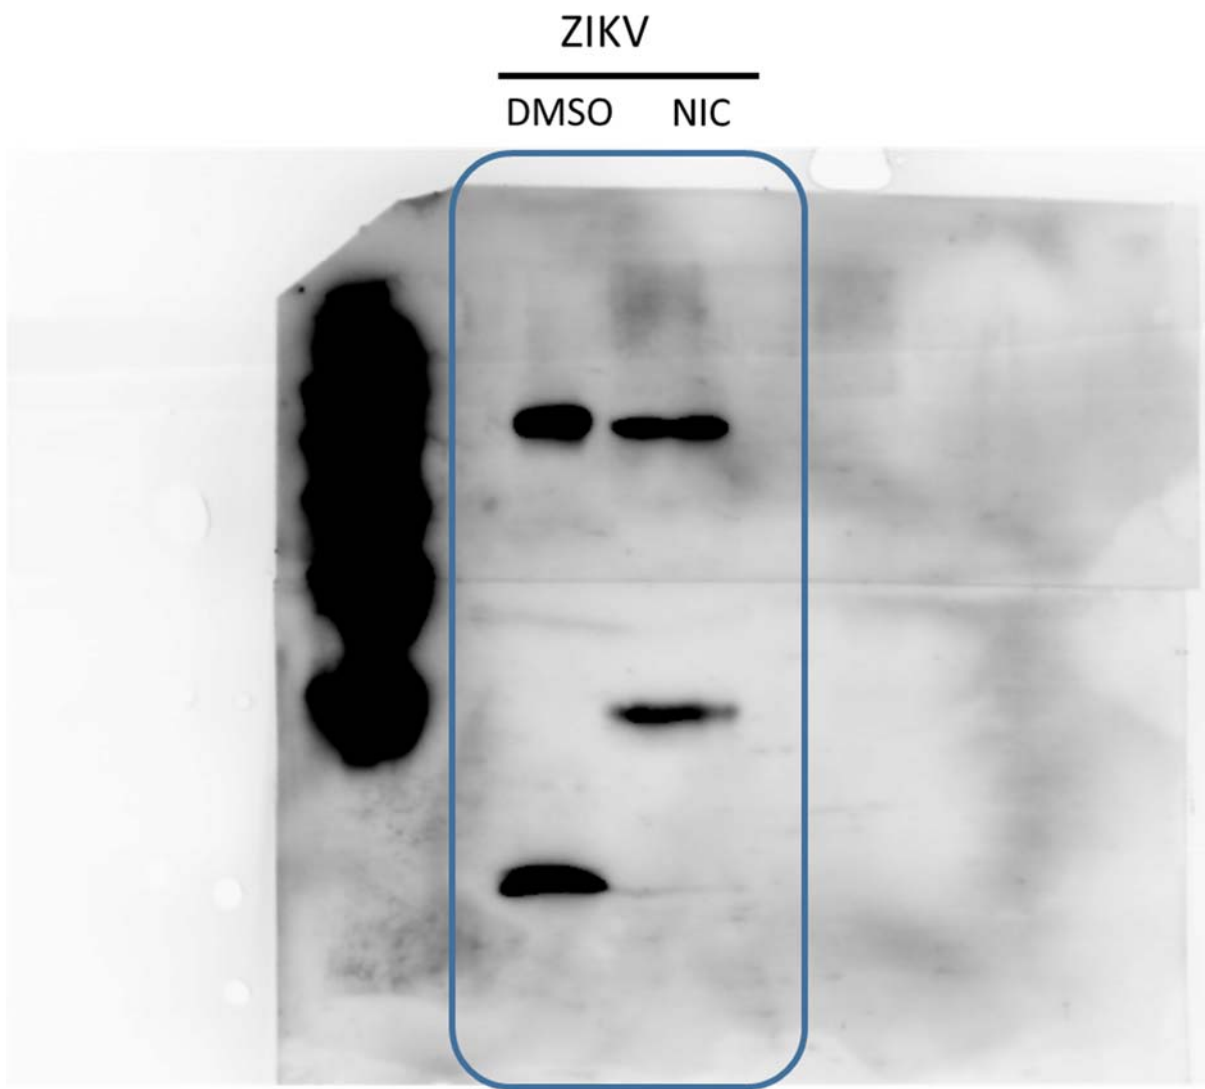

Supplementary Figure S4

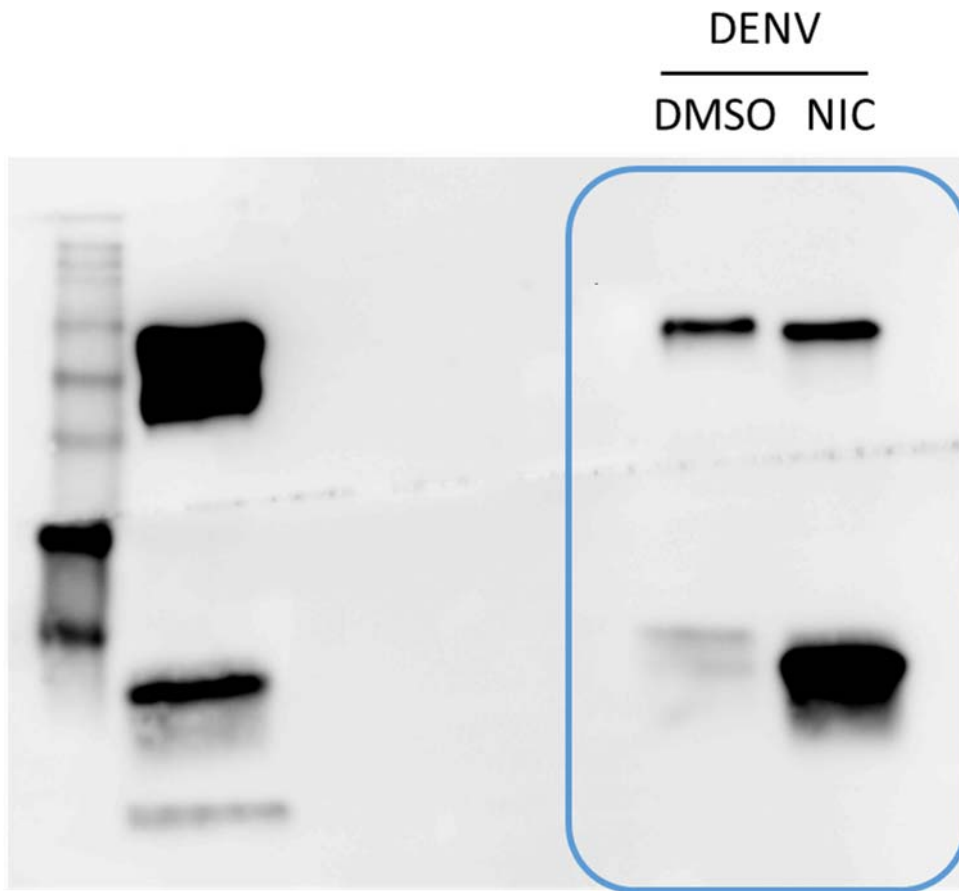

## Materials and Methods

**Antibodies and reagents.** DENV E protein-specific mouse monoclonal antibody (4G2) was prepared from hybridoma cell lines (ATCC<sup>®</sup> HB-112, ATCC). The anti-dsRNA (Scicons, Sziráék, Hungary) monoclonal antibody was used for immunofluorescence analysis. Secondary anti-mouse antibody conjugated to Alexa Fluor 488 (AF488) was obtained from Molecular Probes (Invitrogen). Mouse anti-DENV complex (EMD Millipore, Billerica, MA, USA) and mouse anti-DENV NS1 (Abcam, Cambridge, UK) antibodies were used in focus forming assay for DENV detection. Rabbit anti- DENV prM (GeneTex, Irvine, CA, USA), mouse anti-DENV E (Abcam), and mouse anti-DENV NS3 (Sigma-Aldrich), anti-ZIKV E (GeneTex, Irvine, CA, USA), anti-ZIKV prM (GeneTex) and anti- $\beta$ -actin (loading control; Sigma-Aldrich) antibodies were used for Western blot analysis. Horseradish peroxidase (HRP)-conjugated goat anti-rabbit and anti-mouse secondary antibodies were purchased from Thermo Scientific (Waltham, MA, USA). Ammonium chloride (NH<sub>4</sub>Cl), bafilomycin A1 (BafA1), and niclosamide were purchased from Sigma-Aldrich (St. Louis, MO, USA).

**Cell viability assay.** Cell viability was determined using CellTiter 96 Non-radioactive Cell Proliferation Assay following manufacturer's instructions (MTT; Promega, WI, USA) The absorbance values were measured at 570 nm using a multi-plate reader (Biotek, Winooski, VT, USA). The 50% cytotoxic concentration (CC<sub>50</sub>) was defined as the compound's concentration ( $\mu$ M) required for the reduction of cell viability by 50%, which was calculated by regression analysis using Prism v 6.0 (GraphPad Software, La Jolla, CA, USA).
